# Supplementary material for: IgG Responses to Tissue‐Associated Antigens as Biomarkers of Immunological Treatment Efficacy
Source: Hindawi journal article supplement (doi:10.1155/2011/454861), 2010-12-19
Supplement: f1 [file 454861.f1.pdf]

| <b>Gene name</b>                                                                                                                 | <b>GenBank Accession</b>                    |
|----------------------------------------------------------------------------------------------------------------------------------|---------------------------------------------|
| Rab acceptor                                                                                                                     | NM_006423.1                                 |
| U-trophon                                                                                                                        | NM_007124.1                                 |
| Amyloid Beta (4) precursor protein                                                                                               | NM_000484.1                                 |
| Protein Phosphatase 1                                                                                                            | NM_002709.1                                 |
| hRPK.209-J-20 DNA from chromosome 17                                                                                             | AC005822.1                                  |
| NY-BR-87/Ribosomal protein S26                                                                                                   | AF308301.1 /<br>NM_030811.2                 |
| KIAA0174 from chromosome 16                                                                                                      | NM_014761.1                                 |
| Cutaneous T cell lymphoma tumor antigen sel-1                                                                                    | AF273042.1                                  |
| FLJ39409 Cdna                                                                                                                    | AK096728.1                                  |
| Macrophage capping protein gelsolin-like (CAPG)                                                                                  | NM_001747.1                                 |
| Carbonic anhydrase IV                                                                                                            | NM_000717.2                                 |
| BAC C-2506P8 from chromosome 14                                                                                                  | AL136040.5                                  |
| RP11-738B7 DNA from chromosome 7                                                                                                 | AC084864.4                                  |
| Centromere protein E                                                                                                             | NM_001813.1                                 |
| Prostate specific antigen (PSA)                                                                                                  | M27274.1                                    |
| Cas-Br-M ecotropic retroviral transforming sequence c (CBLC)                                                                     | NM_012116.2                                 |
| Dual specificity phosphatase 12                                                                                                  | BC006286.3                                  |
| Protein kinase A anchor protein 13/lymphoid blast crisis oncogene/breast cancer nuclear receptor-binding auxiliary protein (BRX) | NM_144767.1 /<br>BC017368.1 /<br>AF126008.1 |
| BAC RP11-752K22 from chromosome 2                                                                                                | AC073879.7                                  |
| Frizzled-1                                                                                                                       | AB017363.1                                  |
| RP11-429G19 DNA from chromosome 10                                                                                               | AL365273.25                                 |
| o-fucosyltransferase                                                                                                             | XM_047011.2                                 |
| NICE5                                                                                                                            | NM_017582.3                                 |
| Nucleolar autoantigen / MAD-Pro-34                                                                                               | NM_006455.1                                 |
| Adducin 1                                                                                                                        | NM_014190.1                                 |
| RP11-3J10 on chromosome 9                                                                                                        | AL138752.5                                  |
| Chitobiase                                                                                                                       | BC024007.1                                  |
| FLJ10710 cDNA                                                                                                                    | AK001572.1                                  |
| RP11-3J10 on chromosome 13                                                                                                       | AL356915.19                                 |
| Peroxisomal D3,D2 enoyl CoA isomerase/Hepatocellular carcinoma-associated antigen 64                                             | NM_006117.1 /<br>AF257175.1                 |
| Helicase with SNF2 domain                                                                                                        | XM_033511.8                                 |
| NY-CO-7/STUB1/CLL-associated antigen KW-8                                                                                        | AF039689.1 /<br>XM_083939.1 /<br>AF432221.1 |
| RP11-746L20 DNA from chromosome 8                                                                                                | AC021558.10                                 |
| Centaurin gamma 3                                                                                                                | NM_031946.2                                 |
| Pituitary tumor-transforming 1 interacting protein                                                                               | BC034250.1                                  |
| BAC RP11-321G3                                                                                                                   | AC069506.14                                 |
| CTB-179K24 DNA on chromosome 19                                                                                                  | AC011489.6                                  |
| Caspase domain recruitment (CARD11)                                                                                              | NM_032415.2                                 |
| Cytovillin 2                                                                                                                     | NM_003379.3                                 |

|                                                |                |
|------------------------------------------------|----------------|
| Beta tubulin                                   | BC029529.1     |
| Mage A1                                        | NM_004988      |
| SSX-2                                          | BC007343       |
| Ny-ESO1                                        | AJ003149       |
| Gage 7                                         | NM_021123      |
| SSX-4                                          | U90841         |
| NXF-2                                          | BC015020       |
| TPX 1                                          | BC022011       |
| Xage 1                                         | BC009538       |
| Lage 1                                         | BC002833       |
| Page 1                                         | BC010897       |
| Mage E1                                        | BC081566       |
| Span XC                                        | BC054023       |
| Adam 2                                         | BC064547       |
| TSP 50                                         | BC037775       |
| NY-SAR 35                                      | BC034320       |
| Fate 1                                         | BC022064       |
| Page 5                                         | BC009230       |
| Lip1                                           | BC023635       |
| SPA17                                          | BC032457       |
| Mage A8                                        | BE387798       |
| Mage B1                                        | BE897525       |
| Mage B2                                        | BC026071       |
| Mage A4                                        | BC017723       |
| SSX-1                                          | BC001003       |
| Gage 2                                         | BC069397       |
| Gage 4                                         | BC069470       |
| Mage A3                                        | BC016803       |
| MAD-CT-1                                       | NM_002762      |
| MAD-CT-2                                       | AK097414       |
| Androgen receptor ligand-binding domain        | NM_000044.2    |
| Chromosome 17 gene contig.                     | NM_025161.4    |
| Ribosomal protein L7a                          | NM_000972.2    |
| Chromosome 12 gene contig.                     | NM_152636.2    |
| Prostatic acid phosphatase                     | NM_001134194.1 |
| Tripeptidyl peptidase II                       | NM_003291.2    |
| Matrix metalloproteinase 24                    | NM_006690.3    |
| Ribosomal protein L27a                         | NM_000990.4    |
| Prolactin-induced protein                      | NM_002652.2    |
| Immunoglobulin Kappa J region                  | NM_005349.2    |
| Mannose-6-phosphate receptor binding protein 1 | NM_005817.2    |
| Glutaminase 2                                  | NM_013267.2    |
| WNK lysine deficient protein kinase 1          | NM_018979.2    |
| Ubiquitin specific peptidase 31                | NM_020718.3    |
| Semenogelin I, transcript variant 1            | NM_003007.2    |
| Acyl-coenzyme A binding domain containing 3    | NM_022735.3    |
| PAP associated domain                          | NM_001040284.1 |
| Chromosome 3 gene contig.                      | NM_020187.2    |

|                                                                  |                |
|------------------------------------------------------------------|----------------|
| Protein phosphatase 3, regulatory subunit 7                      | NM_002712.1    |
| Transmembrane 4 L6 family member 1                               | NM_014220.2    |
| Ribosomal protein S27a                                           | NM_001135592.1 |
| Plexin B2                                                        | NM_012401.2    |
| Ribosomal protein L17                                            | NM_000985.3    |
| Chromosome 20 gene contig.                                       | NM_080608.3    |
| Aldolase C                                                       | NM_005165.2    |
| Ribosomal protein L5                                             | NM_000969.3    |
| Eukaryotic translation elongation factor 1 alpha 1               | NM_001958.2    |
| Chromosome 16 gene contig.                                       | NM_025108.2    |
| Zinc-finger protein, CW type with coiled-coil domain 3           | NM_015358.2    |
| Acetyl-coenzyme A acyltransferase 1                              | NM_001130410.1 |
| Mitogen-activated protein kinase-activated protein kinase 2      | NM_004750.3    |
| actinin alpha 2                                                  | NM_001103.2    |
| neuronal PAS domain protein 2 (NPAS2)                            | NM_002518.3    |
| caldesmon 1 (CALD1)                                              | NM_033138.2    |
| fms-related tyrosine kinase 3 ligand                             | NM_001459.2    |
| membrane protein, palmitoylated 5 (MAGUK p55 subfamily member 5) | NM_022474.2    |
| TSC22 domain family, member 1 (TSC22D1)                          | NM_006022.2    |
| transgelin                                                       | NM_001001522.1 |
| Chromosome 6 gene contig                                         | NM_022758.4    |
| polymerase (RNA) II (DNA directed) polypeptide E (POLR2E)        | NM_002695.3    |
| NEDD8 activating enzyme subunit 1 (NAE1)                         | NM_001018160.1 |
| Rho guanine nucleotide exchange factor 12 (ARHGEF12)             | NM_015313.1    |
| Chromosome 1 gene contig                                         | NM_152374.1    |
| Chromosome 16 gene contig                                        | NM_001100873.1 |
| Regulator of chromosome condensation 2 (RCC2)                    | NM_001136204.1 |
| Chromosome 5 gene contig                                         | NT_006713.15   |
| Paxillin (PXN)                                                   | NM_025157.3    |
| NSFL1 (p97) cofactor (p47) NSFL1C                                | NM_016143.2    |
| Chromosome 16 gene contig                                        | NM_004913.2    |
| Chromosome 1 gene contig                                         | NM_207356.2    |
| Sorbitol dehydrogenase (SORB)                                    | NM_003104.4    |
| Chromosome 4 gene contig                                         | NT_006316.16   |
| Sec 61 alpha 1 subunit                                           | NM_013336.3    |
| Myosin heavy chain 11 (MYH11)                                    | NM_002474.2    |
| Metastasis associated lung adenocarcinoma transcript 1 (MALAT1)  | NR_002819.2    |
| Similar to laminin receptor 1                                    | NC_000001.10   |
| Chromosome 13 gene contig                                        | NT_009952.14   |
